# Supplementary material
Source: PubMed Central journal article supplement (PMC1595409)
Supplement: pnas_0605979103_3.pdf [file pnas_0605979103_3.pdf]

EXPB1 20 LTARATWYgqpngagapdngGACgiknvnlpypsg  
 GH45 1 ADGRSTRY wdck PSCgwakkapvnpvfscnanfgritdfdaksgcepvgvayscadqtpwaynddfal

I → II →

EXPB1 55 MTACGNVPIFKDGKGCGSCYEVRCKEKPECSGNPVTTVYITDMNYEPIAPYHFDLSgkafgslakpglndklr 126  
 GH45 71 GFAATSIAGSNEAGWCCCACYELTFTSG-PVAGKKMVVQSTSTGGDLG-SNHFDLNipgggvgifdgctpqfg 140

II → III → IV → V → VI →

III → IV → V → VI →

$\alpha_a$        $\alpha_b$        $\alpha_c$

EXPB1 127 HCGIMDVEFRRVRCKY 142  
 GH45 141 glpggryggissrnecdrfpdalkpgcywrfdwfkNADNPSFSFRQVQCPAelvartgcrnrnddgnfpav 210

VI → VII →

$\alpha_a$        $\alpha_b$        $\alpha_c$
