# Supplementary material
Source: PubMed Central journal article supplement (PMC1595409)

A

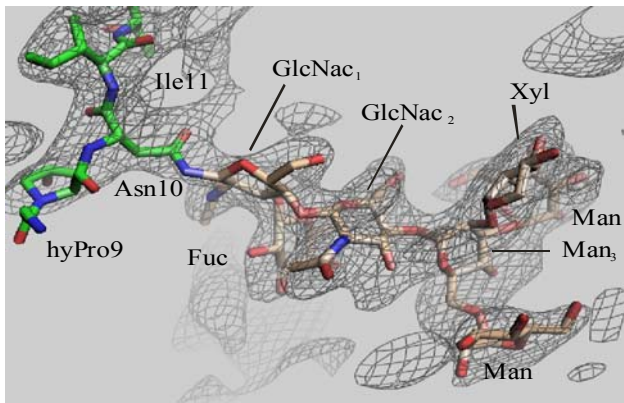

B

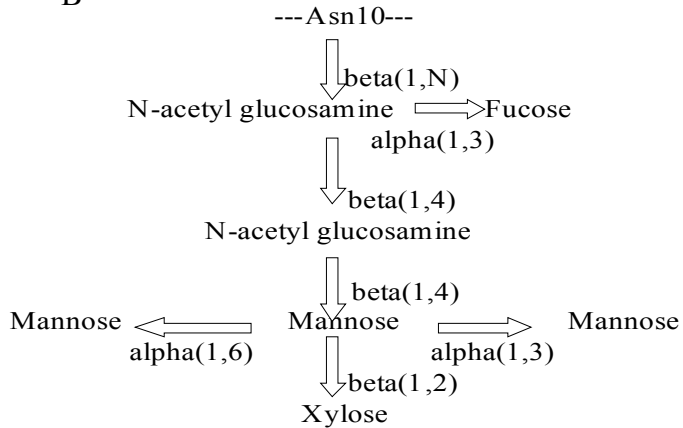

Supplement: pnas_0605979103_1.pdf [file pnas_0605979103_1.pdf]

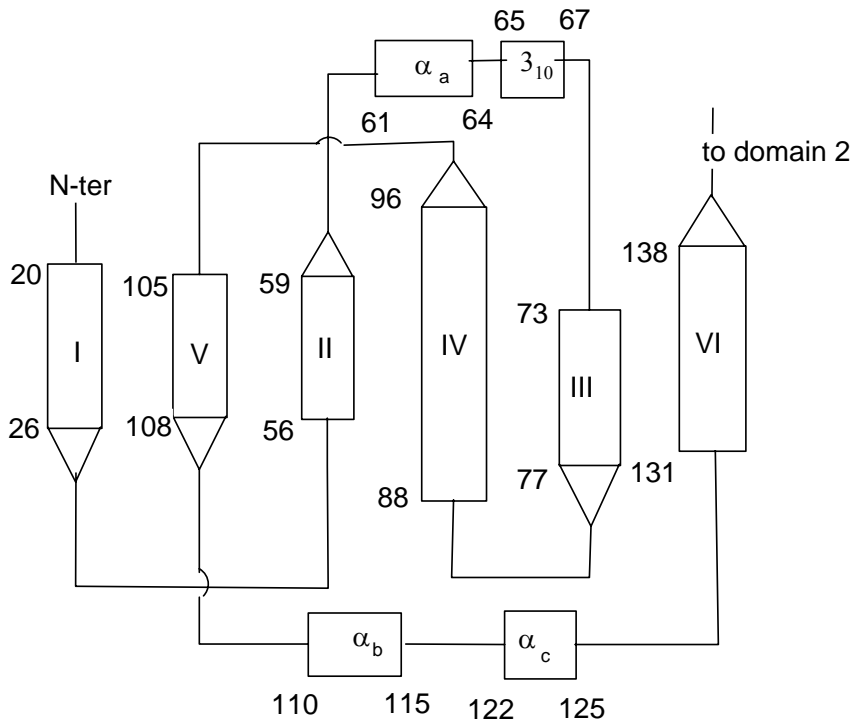

Supplement: pnas_0605979103_2.pdf [file pnas_0605979103_2.pdf]

A: wall extension - wheat coleoptile

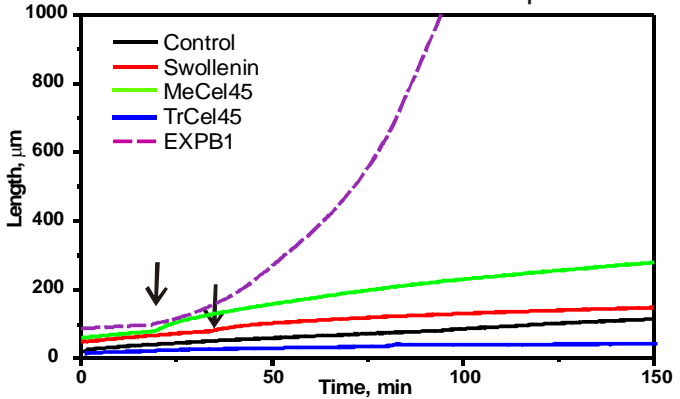

B: wall extension - cucumber

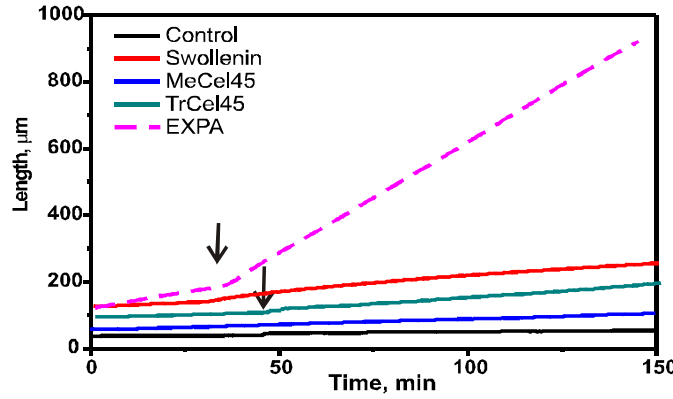

Supplement: pnas_0605979103_4.pdf [file pnas_0605979103_4.pdf]

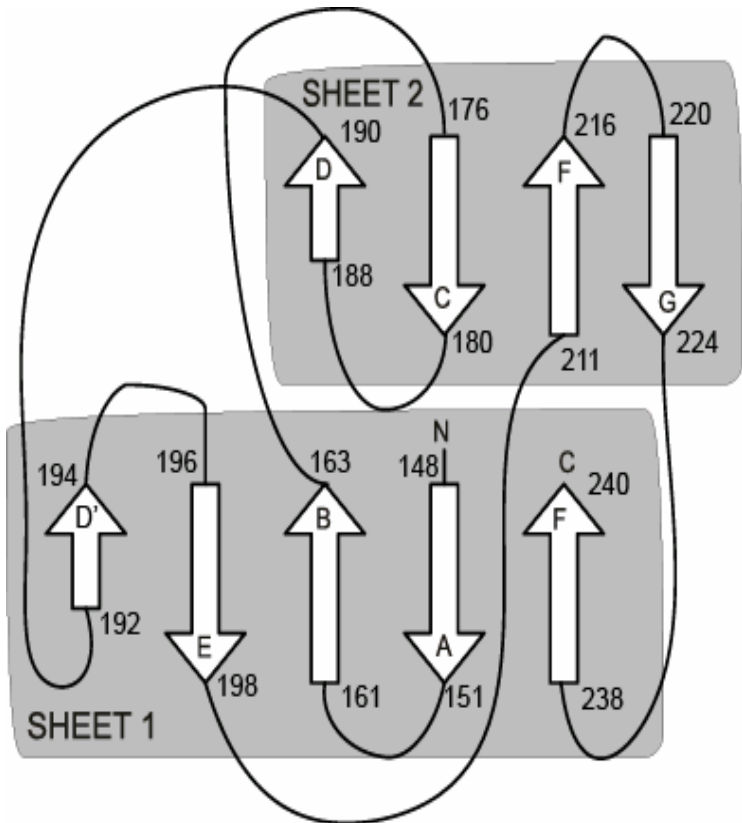

Supplement: pnas_0605979103_5.pdf [file pnas_0605979103_5.pdf]
